# Supplementary material for: An Interactive Voice Response and Text Message Intervention to Improve Blood Pressure Control Among Individuals With Hypertension Receiving Care at an Urban Indian Health Organization: Protocol and Baseline Characteristics of a Pragmatic Randomized Controlled Trial
Source: PubMed Central journal article supplement (PMC6465973; doi:10.2196/11794), 2019-04-02
Supplement: resprot_v8i4e11794_app1.pdf [file resprot_v8i4e11794_app1.pdf]

## Multimedia Appendix 1. Messaging used for the IVR-T intervention.

| English - Telephone                                                                                                                                | Spanish - Telephone                                                                                                                                                                                  | English - SMS                                                                                                                            | Spanish - SMS                                                                                                                                                                                |
|----------------------------------------------------------------------------------------------------------------------------------------------------|------------------------------------------------------------------------------------------------------------------------------------------------------------------------------------------------------|------------------------------------------------------------------------------------------------------------------------------------------|----------------------------------------------------------------------------------------------------------------------------------------------------------------------------------------------|
| <b>General motivational messages</b>                                                                                                               |                                                                                                                                                                                                      |                                                                                                                                          |                                                                                                                                                                                              |
| Remember that high blood pressure can increase your chance of having a heart attack or stroke. Ask your provider what your goal blood pressure is. | Recuerde que la presión alta puede aumentar la probabilidad de desarrollar un ataque al corazón o un derrame cerebral. Pregúntele a su doctor o doctora cuál debe ser su meta al medirse la presión. | High blood pressure can increase your chance of having a heart attack or stroke. Ask your provider what your goal blood pressure is.     | Recuerde que la presión alta puede aumentar la probabilidad de desarrollar un ataque al corazón o un derrame cerebral. Pregúntele a su doctor/a cuál debe ser su meta al medirse la presión. |
| Contact your provider at #FacTelNo# if you have chest pain, shortness of breath, or swollen legs. [1]                                              | Comuníquese con su doctor/a al #FacTelNo# si tiene dolor de pecho, falta de aire o las piernas hinchadas.                                                                                            | Contact your provider at #FacilityTelNo# if you have chest pain, shortness of breath, or swollen legs.                                   | Comuníquese con su doctor/a al #FacTelNo# si tiene dolor de pecho, falta de aire o las piernas hinchadas.                                                                                    |
| You're doing very well. Please keep on with your pills, come to your clinic appointments, exercise and eat healthy food. [1,2]                     | Está haciendo las cosas muy bien. Siga tomando sus pastillas, acuda a sus citas en la clínica, haga ejercicio y coma alimentos saludables.                                                           | You're doing very well. Please keep on with your pills, come to your clinic appointments, exercise and eat healthy food.                 | Está haciendo todo muy bien. Siga tomando sus pastillas, acuda a sus citas en la clínica, haga ejercicio y coma alimentos saludables.                                                        |
| <b>Adherence</b>                                                                                                                                   |                                                                                                                                                                                                      |                                                                                                                                          |                                                                                                                                                                                              |
| A pill box can help you to remember when to take your high blood pressure pills. You can get one at the pharmacy.                                  | Una cajita para organizar sus pastillas puede ayudarle a recordar cuándo debe tomar sus medicinas para la presión. Puede conseguir una en la farmacia.                                               | A pill box can help you to remember when to take your high blood pressure pills. You can get one at the pharmacy.                        | Una cajita para organizar sus pastillas puede ayudarle a recordar cuándo debe tomar sus medicinas para la presión alta. Puede conseguir una en la farmacia.                                  |
| Make taking your pills part of your daily routine, like when you first wake up. Doing this can help you remember to take them regularly. [2]       | Tomar sus pastillas debe formar parte de su rutina diaria, por ejemplo, tómelas al despertarse. Esto puede ayudarle a recordar que debe                                                              | Make taking your pills part of your daily routine, like when you first wake up. Doing this can help you remember to take them regularly. | Tomar sus pastillas debe formar parte de su rutina diaria, por ejemplo, tómelas al despertarse. Esto puede ayudarle a recordar que debe                                                      |

|                                                                                                                                           |                                                                                                                                                       |                                                                                                                                           |                                                                                                                                                       |
|-------------------------------------------------------------------------------------------------------------------------------------------|-------------------------------------------------------------------------------------------------------------------------------------------------------|-------------------------------------------------------------------------------------------------------------------------------------------|-------------------------------------------------------------------------------------------------------------------------------------------------------|
|                                                                                                                                           | tomarlas regularmente.                                                                                                                                |                                                                                                                                           | tomarlas regularmente.                                                                                                                                |
| Ask someone you trust to help you remember to take your medicine as directed. [2]                                                         | Pídale a alguien de confianza que le ayude a recordar que debe tomar sus medicinas como se le indicó.                                                 | Ask someone you trust to help you remember to take your medicine as directed.                                                             | Pídale a alguien de confianza que le ayude a recordar que debe tomar sus medicinas como se le indicó.                                                 |
| Don't stop taking your medication because you feel better. Remember you can have high blood pressure without having symptoms. [1]         | No deje de tomar sus medicamentos porque se siente mejor. Recuerde que puede tener la presión alta y no tener síntomas.                               | Don't stop taking your medication because you feel better. Remember you can have high blood pressure without having symptoms.             | No deje de tomar sus medicamentos porque se siente mejor. Recuerde que puede tener la presión alta y no tener síntomas.                               |
| If you are afraid of being dependent on your high blood pressure pills, please talk with your provider or pharmacist about your concerns. | Si tiene miedo que las pastillas para la presión alta le causen dependencia, por favor, hable con su doctor/a o farmacéutico/a sobre sus inquietudes. | If you are afraid of being dependent on your high blood pressure pills, please talk with your provider or pharmacist about your concerns. | Si tiene miedo que las pastillas para la presión alta le causen dependencia, por favor, hable con su doctor/a o farmacéutico/a sobre sus inquietudes. |
| If you are experiencing a side effect from your high blood pressure pills, please talk with your provider or pharmacist. [2]              | Si sus pastillas para la presión le ocasionan algún efecto secundario, por favor, hable con su doctor/a o farmacéutico/a                              | If you are experiencing a side effect from your high blood pressure pills, please talk with your provider or pharmacist.                  | Si sus pastillas para la presión le ocasionan algún efecto secundario, por favor, hable con su doctor/a o farmacéutico/a                              |
| <b>Stress management</b>                                                                                                                  |                                                                                                                                                       |                                                                                                                                           |                                                                                                                                                       |
| To decrease stress: Breathe in deeply for 4 seconds and out slowly for 4 seconds.                                                         | Para disminuir el estrés: aspire el aliento profundamente durante 4 segundos y exhale lentamente durante 4 segundos.                                  | To decrease stress: Breathe in deeply for 4 seconds and out slowly for 4 seconds.                                                         | Para disminuir el estrés: aspire el aliento profundamente durante 4 segundos y exhale lentamente durante 4 segundos.                                  |
| To decrease stress: Take a mental vacation – spend 3 minutes in your favorite place.                                                      | Para disminuir el estrés: tómese vacaciones mentales, imagínese que está en su lugar favorito durante 3 minutos.                                      | To decrease stress: Take a mental vacation – spend 3 minutes in your favorite place.                                                      | Para disminuir el estrés: tómese vacaciones mentales, imagínese que está en su lugar favorito durante 3 minutos.                                      |
| To decrease stress: Imagine the last time                                                                                                 | Para disminuir el estrés: imagine la                                                                                                                  | To decrease stress: Imagine the last time                                                                                                 | Para disminuir el estrés: imagine la                                                                                                                  |

|                                                                                                                           |                                                                                                                            |                                                                                                      |                                                                                                                            |
|---------------------------------------------------------------------------------------------------------------------------|----------------------------------------------------------------------------------------------------------------------------|------------------------------------------------------------------------------------------------------|----------------------------------------------------------------------------------------------------------------------------|
| you laughed really hard – now laugh twice as hard.                                                                        | última vez que se rio a carcajadas, ahora ríase el doble de fuerte.                                                        | you laughed really hard – now laugh twice as hard.                                                   | última vez que se rio a carcajadas, ahora ríase el doble de fuerte.                                                        |
| To decrease stress: Listen to some of your favorite music or go for a walk.                                               | Para disminuir el estrés: escuche su música favorita o salga a caminar.                                                    | To decrease stress: Listen to some of your favorite music or go for a walk.                          | Para disminuir el estrés: escuche su música favorita o salga a caminar.                                                    |
| To decrease stress: Put your hand over your heart and feel it slowly calm down.                                           | Para disminuir el estrés: Coloque la mano sobre el corazón y sienta como se calma lentamente.                              | Put your hand over your heart and feel it slowly calm down.                                          | Para disminuir el estrés: Coloque la mano sobre el corazón y sienta como se calma lentamente.                              |
| <b>Coping with change</b>                                                                                                 |                                                                                                                            |                                                                                                      |                                                                                                                            |
| Adding healthy habits takes time. Even small changes can help.                                                            | Añadir costumbres saludables toma tiempo. Hasta los cambios pequeños pueden ayudar.                                        | Adding healthy habits takes time. Even small changes can help.                                       | Añadir costumbres saludables toma tiempo. Hasta los cambios pequeños pueden ayudar.                                        |
| Adding healthy habits takes time. Ask for help at your clinic – the team cares for you.                                   | Añadir costumbres saludables toma tiempo. Solicite ayuda en su clínica, el equipo se preocupa por usted.                   | Adding health habits takes time. Ask for help at your clinic – the team cares for you.               | Añadir costumbres saludables toma tiempo. Solicite ayuda en su clínica, el equipo se preocupa por usted.                   |
| <b>Inspiration</b>                                                                                                        |                                                                                                                            |                                                                                                      |                                                                                                                            |
| A healthy family starts with a healthy you. Keep up the good work.                                                        | La buena salud de su familia comienza cuando usted disfruta de buena salud. Siga así.                                      | A healthy family starts with a healthy you. Keep up the good work.                                   | La buena salud de su familia comienza cuando usted disfruta de buena salud. Siga así.                                      |
| A healthy community starts with a healthy you. Start by making small changes to improve your health.                      | Una comunidad saludable comienza con usted. Empiece a hacer pequeños cambios para mejorar su salud.                        | A healthy community starts with a healthy you. Start by making small changes to improve your health. | Una comunidad saludable comienza con usted. Empiece a hacer pequeños cambios para mejorar su salud.                        |
| Good health gives us more energy to play with our kids and grandkids. Keep up the good work.                              | La buena salud nos da más energía para jugar con nuestros hijos y nietos. Siga así.                                        | Good health gives us more energy to play with our kids and grandkids. Keep up the good work.         | La buena salud nos da más energía para jugar con nuestros hijos y nietos. Siga así.                                        |
| Remember that you have people to turn to when times get tough. Call on a friend, family member, or your health care team. | Recuerde que cuenta con personas a las que puede recurrir en situaciones difíciles. Llame a un amigo, a un pariente o a su | You have people to turn to when times get tough, a friend, family member, or your health care team.  | Recuerde que cuenta con personas a las que puede recurrir en situaciones difíciles. Llame a un amigo, a un pariente o a su |

|                                                                                                                                                        |                                                                                                                                                                        |                                                                                                                                                    |                                                                                                                                                                        |
|--------------------------------------------------------------------------------------------------------------------------------------------------------|------------------------------------------------------------------------------------------------------------------------------------------------------------------------|----------------------------------------------------------------------------------------------------------------------------------------------------|------------------------------------------------------------------------------------------------------------------------------------------------------------------------|
|                                                                                                                                                        | equipo de atención médica.                                                                                                                                             |                                                                                                                                                    | equipo de atención médica.                                                                                                                                             |
| Our ancestors have a history of healthy eating. Try to eat more traditionally and healthy.                                                             | Nuestros antepasados se alimentaban de manera saludable. Intente comer de forma más tradicional y saludable.                                                           | Our ancestors have a history of healthy eating. Try to eat more traditionally and healthy.                                                         | Nuestros antepasados se alimentaban de manera saludable. Intente comer de forma más tradicional y saludable.                                                           |
| Our ancestors have a history of healthy eating. Eat only what sustains you.                                                                            | Nuestros antepasados se alimentaban de manera saludable. Acostúmbrese a comer solamente lo que le sustenta.                                                            | Our ancestors have a history of healthy eating. Eat only what sustains you.                                                                        | Nuestros antepasados se alimentaban de manera saludable. Acostúmbrese a comer solamente lo que le sustenta.                                                            |
| <b>Diet – salt intake</b>                                                                                                                              |                                                                                                                                                                        |                                                                                                                                                    |                                                                                                                                                                        |
| Foods high in salt can increase blood pressure. Taste food before you add salt. [1]                                                                    | Los alimentos con alto contenido de sal pueden subir la presión. Pruebe los alimentos antes de agregarles sal.                                                         | Foods high in salt can increase blood pressure. Taste food before you add salt.                                                                    | Los alimentos con alto contenido de sal pueden subir la presión. Pruebe los alimentos antes de agregarles sal.                                                         |
| Reduce how much salt you cook with little by little. That way you and your family will get used to it. [3]                                             | Reduzca poco a poco la sal que le añade a la comida cuando cocina; de esta manera, usted y su familia se acostumbrarán.                                                | Reduce how much salt you cook with little by little. That way you and your family will get used to it.                                             | Reduzca poco a poco la sal que le añade a la comida cuando cocina; de esta manera, usted y su familia se acostumbrarán.                                                |
| To help reduce salt intake, use spices instead of salt in cooking and at the table. Flavor foods with herbs, citrus, vinegar, or salt-free blends. [4] | Para reducir la sal en la comida, reemplace la sal por especias, en la cocina y en la mesa. Sazone las comidas con hierbas, jugo de limón, vinagre o especias sin sal. | To help reduce salt intake, use spices instead of salt in cooking and at the table. Flavor foods with herbs, citrus, vinegar, or salt-free blends. | Para reducir la sal en la comida, reemplace la sal por especias, en la cocina y en la mesa. Sazone las comidas con hierbas, jugo de limón, vinagre o especias sin sal. |
| To help reduce salt intake, try to eat less canned vegetables. Eat frozen or fresh vegetables instead.                                                 | Para ayudar a reducir la sal en la comida, pruebe comer menos verduras enlatadas. Seleccione verduras congeladas o frescas.                                            | To help reduce salt intake, try to eat less canned vegetables. Eat frozen or fresh vegetables instead.                                             | Para ayudar a reducir la sal en la comida, pruebe comer menos verduras enlatadas. Seleccione verduras congeladas o frescas.                                            |
| <b>Diet – other measures</b>                                                                                                                           |                                                                                                                                                                        |                                                                                                                                                    |                                                                                                                                                                        |

|                                                                                                                                                                  |                                                                                                                                                                                 |                                                                                                                                                              |                                                                                                                                                                                 |
|------------------------------------------------------------------------------------------------------------------------------------------------------------------|---------------------------------------------------------------------------------------------------------------------------------------------------------------------------------|--------------------------------------------------------------------------------------------------------------------------------------------------------------|---------------------------------------------------------------------------------------------------------------------------------------------------------------------------------|
| Take care of your family by setting a good example. Try to eat 5 portions of fruits and vegetables every day. Put vegetables on your rice, pasta, and stews. [3] | Cuide a su familia poniendo un buen ejemplo. Trate de comer 5 porciones de frutas y verduras todos los días. Añada verduras al arroz, la pasta y los guisos.                    | Take care of your family by setting a good example. Try to eat 5 portions of fruits and vegetables every day. Put vegetables on your rice, pasta, and stews. | Cuide a su familia poniendo el ejemplo. Trate de comer 5 porciones de frutas y verduras todos los días. Añada verduras al arroz, la pasta y los guisos.                         |
| Feeling like snacking? Try a raw carrot, some tomatoes or cucumbers or a fruit. These are healthier than chips and cookies. [1]                                  | ¿Se le antoja comer un bocadillo o botana? Cómate una zanahoria cruda, algunos tomates, pepinos o una fruta, que son más saludables que las papas fritas y las galletas dulces. | Feeling like snacking? Try a raw carrot, some tomatoes or cucumbers or a fruit. These are healthier than chips and cookies.                                  | ¿Se le antoja comer un bocadillo o botana? Cómate una zanahoria cruda, algunos tomates, pepinos o una fruta, que son más saludables que las papas fritas y las galletas dulces. |
| Fast food is often high in fat and salt. Instead of fries, try a salad. [1]                                                                                      | La comida rápida o comida chatarra, por lo general, tiene mucha grasa y sal. En lugar de papas fritas, coma una ensalada.                                                       | Fast food is often high in fat and salt. Instead of fries, try a salad.                                                                                      | La comida rápida o comida chatarra, por lo general, tiene mucha grasa y sal. En lugar de papas fritas, coma una ensalada.                                                       |
| To avoid gaining weight, drink water instead of pop, juices, or other sugar sweetened drinks. [3]                                                                | Para evitar subir de peso, beba agua en lugar de refrescos, jugos u otras bebidas endulzadas con azúcar.                                                                        | To avoid gaining weight, drink water instead of pop, juices, or other sugar-sweetened drinks.                                                                | Para evitar subir de peso, beba agua en lugar de refrescos, jugos u otras bebidas endulzadas con azúcar.                                                                        |
| <b>Physical activity and weight management</b>                                                                                                                   |                                                                                                                                                                                 |                                                                                                                                                              |                                                                                                                                                                                 |
| Did you know that blood pressure rises as your weight increases? Losing even a small amount of weight can lower blood pressure. [4]                              | ¿Sabe usted que a medida que aumenta de peso aumenta su presión? Perder un poco de peso puede ayudar a bajar su presión.                                                        | Did you know that blood pressure rises as your weight increases? Losing even a small amount of weight can lower blood pressure.                              | ¿Sabe usted que a medida que aumenta de peso aumenta su presión? Perder un poco de peso puede ayudar a bajar su presión.                                                        |
| Physical activity lowers blood pressure. Try a 30 minute walk or three 10 minute walks. Every little bit helps [4]                                               | El ejercicio baja la presión. Pruebe caminar 30 minutos al día. Si prefiere, camine 10 minutos 3 veces al día. Todo ayuda.                                                      | Physical activity lowers blood pressure. Try a 30 minute walk or three 10 minute walks. Every little bit helps.                                              | El ejercicio baja la presión. Pruebe caminar 30 minutos al día. Si prefiere, camine 10 minutos 3 veces al día. Todo ayuda.                                                      |

|                                                                                                                                         |                                                                                                                                                       |                                                                                                                                         |                                                                                                                                                       |
|-----------------------------------------------------------------------------------------------------------------------------------------|-------------------------------------------------------------------------------------------------------------------------------------------------------|-----------------------------------------------------------------------------------------------------------------------------------------|-------------------------------------------------------------------------------------------------------------------------------------------------------|
| Be active. Physical activity is one of the best ways to lower your stress. You can walk or exercise at home. [1]                        | Manténgase activo. El ejercicio es una de las mejores maneras de disminuir el estrés. Puede caminar o hacer ejercicio en casa.                        | Be active. Physical activity is one of the best ways to lower your stress. You can walk or exercise at home.                            | Manténgase activo. El ejercicio es una de las mejores maneras de disminuir el estrés. Puede caminar o hacer ejercicio en casa.                        |
| Try to do 30 minutes of physical activity every day. Start by doing something easy for you and increase the time little by little. [3]  | Trate de hacer 30 minutos de ejercicio todos los días. Empiece con algo que le resulte fácil y aumente el tiempo poco a poco.                         | Try to do 30 minutes of physical activity every day. Start by doing something easy for you and increase the time little by little.      | Trate de hacer 30 minutos de ejercicio todos los días. Empiece con algo que le resulte fácil y aumente el tiempo poco a poco.                         |
| <b>Blood pressure monitoring</b>                                                                                                        |                                                                                                                                                       |                                                                                                                                         |                                                                                                                                                       |
| Keeping track of your blood pressure at home can help you see how you are doing. Let your provider know if your blood pressure is high. | Anotar los resultados de su presión al medírsela en su casa puede ayudarle a ver si mejora o empeora. Si su presión está alta, avísele a su doctor/a. | Keeping track of your blood pressure at home can help you see how you are doing. Let your provider know if your blood pressure is high. | Anotar los resultados de su presión al medírsela en su casa puede ayudarle a ver si mejora o empeora. Si su presión está alta, avísele a su doctor/a. |

## MULTIMEDIA APPENDIX REFERENCES

1. Hacking D, Haricharan HJ, Brittain K, et al. Hypertension health promotion via text messaging at a community health center in South Africa: a mixed methods study. *JMIR Mhealth Uhealth* 2016;4(1):e22. PMID:26964505
2. Bobrow K, Farmer AJ, Springer D, et al. Mobile phone text messages to support treatment adherence in adults with high blood pressure (SMS-Text Adherence Support [StAR]): a single-blind, randomized trial. *Circulation*.2016;133(6):592-600. PMID:26769742
3. Diez-Canseco F, Zavala-Loayza JA, Beratarrechea A, et al. Design and multi-country validation of text messages for an mHealth intervention for primary prevention of progression to hypertension in Latin America. *JMIR Mhealth Uhealth* 2015;3(1):e19. PMID:25693595
4. Buis LR, Artinian NT, Schwiebert L, Yarandi H, Levy PD. Text messaging to improve hypertension medication adherence in African Americans: BPMED intervention development and study protocol. *JMIR Res Protoc* 2015;4(1):e1. PMID:25565680
