# Supplementary material for: An Interactive Voice Response and Text Message Intervention to Improve Blood Pressure Control Among Individuals With Hypertension Receiving Care at an Urban Indian Health Organization: Protocol and Baseline Characteristics of a Pragmatic Randomized Controlled Trial
Source: PubMed Central journal article supplement (PMC6465973; doi:10.2196/11794), 2019-04-02

**Multimedia Appendix 5. Recruitment plot.**

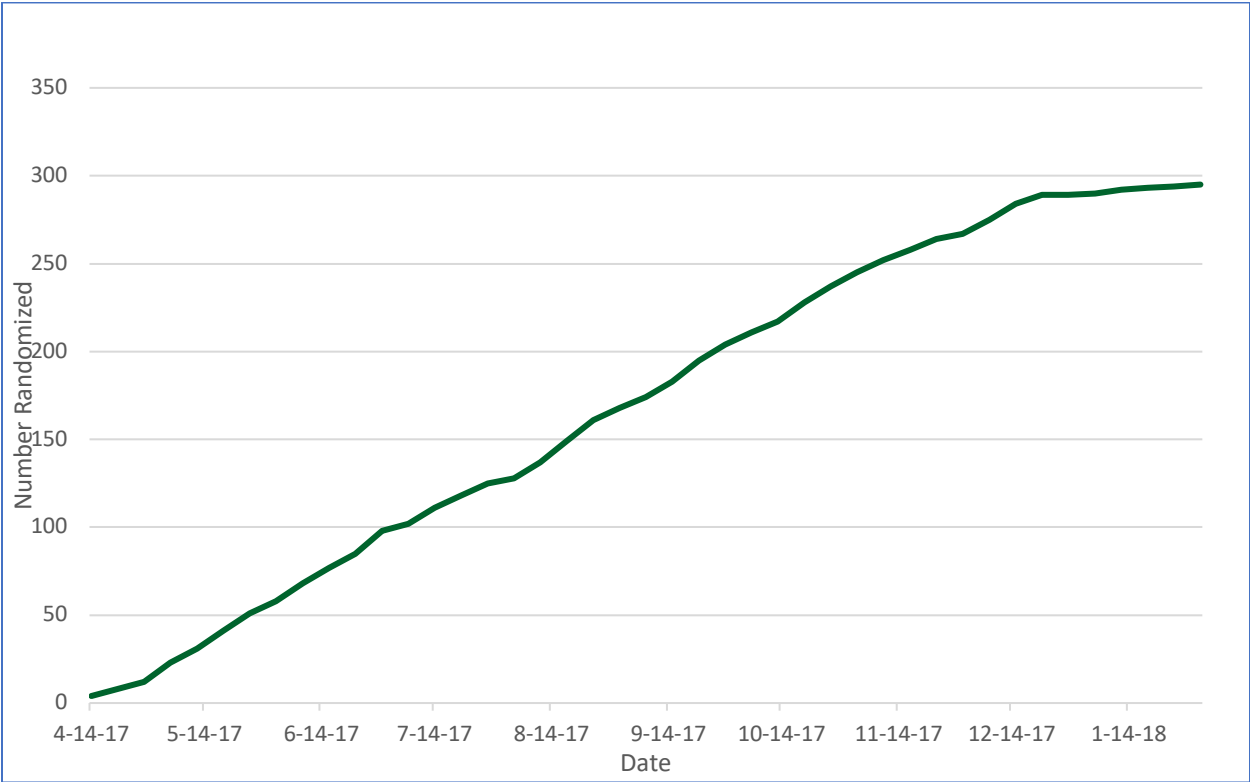

Supplement: resprot_v8i4e11794_app5.pdf [file resprot_v8i4e11794_app5.pdf]
